# Supplementary material for: MineProt: a stand-alone server for structural proteome curation
Source: Oxford University Press journal article supplement (doi:10.1093/database/baad059), 2023-01-01
Supplement: baad059_supp.zip [file baad059_supp.zip]

# Browse demo

⌵ Sort by pLDDT

⌵ Sort by name

🔄 Refresh

| Name       | Structure         | pLDDT | MSA | Annotation                                                  |
|------------|-------------------|-------|-----|-------------------------------------------------------------|
| CP00000106 | <div>PDBCIF</div> | 98.23 | A3M | Thioredoxin                                                 |
| CP00004462 | <div>PDBCIF</div> | 98.10 | A3M | retinal dehydrogenase 2-like isoform X1                     |
| CP00001235 | <div>PDBCIF</div> | 98.04 | A3M | Glutathione transferase                                     |
| CP00000602 | <div>PDBCIF</div> | 97.99 | A3M | Peptidyl-prolyl cis-trans isomerase                         |
| CP00004464 | <div>PDBCIF</div> | 97.99 | A3M | aldehyde dehydrogenase X, mitochondrial                     |
| CP00002762 | <div>PDBCIF</div> | 97.98 | A3M | Glyceraldehyde-3-phosphate dehydrogenase                    |
| CP00000604 | <div>PDBCIF</div> | 97.96 | A3M | Peptidyl-prolyl cis-trans isomerase                         |
| CP00001477 | <div>PDBCIF</div> | 97.94 | A3M | Type 1 glutamine amidotransferase domain-containing protein |
| CP00001394 | <div>PDBCIF</div> | 97.93 | A3M | Type 1 glutamine amidotransferase domain-containing protein |
| CP00001479 | <div>PDBCIF</div> | 97.92 | A3M | Type 1 glutamine amidotransferase domain-containing protein |
| CP00000098 | <div>PDBCIF</div> | 97.90 | A3M | Uncharacterized protein                                     |
| CP00002573 | <div>PDBCIF</div> | 97.89 | A3M | Transaldolase                                               |
| CP00000606 | <div>PDBCIF</div> | 97.87 | A3M | Peptidyl-prolyl cis-trans isomerase                         |
| CP00000596 | <div>PDBCIF</div> | 97.87 | A3M | Peptidyl-prolyl cis-trans isomerase                         |
| CP00000366 | <div>PDBCIF</div> | 97.86 | A3M | Profilin                                                    |
| CP00000510 | <div>PDBCIF</div> | 97.84 | A3M | Superoxide dismutase [Cu-Zn]                                |

## Generate command for importing

System

ColabFold

Repository

demo

Naming mode

0: Use prefix

Path to data

/tmp/data

Path to python3

/usr/bin/python3

Path to MineProt scripts

/toolkit/scripts

Parameters

☒ --zip

☒ --amber

Generate

```
cd ./toolkit/scripts

# If your data are raw outputs from colabfold, run:

colabfold/import.sh /tmp/data --repo demo \
--name-mode 0 \
--zip \
--relax \
--python /usr/bin/python3 \
--url http://223.3.59.192

# If your data have been preprocessed by colabfold/transform.py, run:

/usr/bin/python3 import2es.py -n demo -i /tmp/data -a --url http://223.3.59.192/api/es
/usr/bin/python3 import2repo.py -n demo -i /tmp/data --url http://223.3.59.192/api/import2repo/
```
